# Supplementary material
Source: MDPI journal article supplement (https://www.mdpi.com/2073-4344/13/7/1030)
Supplement: s1 [file s1]

# Conversion of CO<sub>2</sub> Hydrogenation to Methanol over K/ Ni Promoted MoS<sub>2</sub>/MgO Catalyst

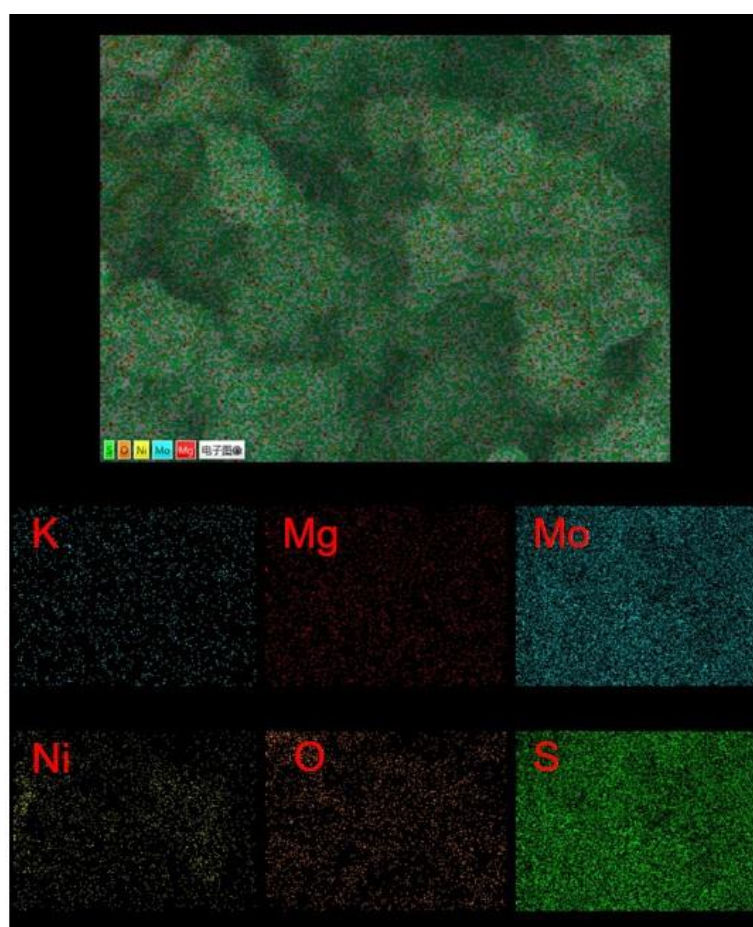

Figure S1 elemental mapping of the 10%K-NiMoS<sub>2</sub>/MgO catalyst

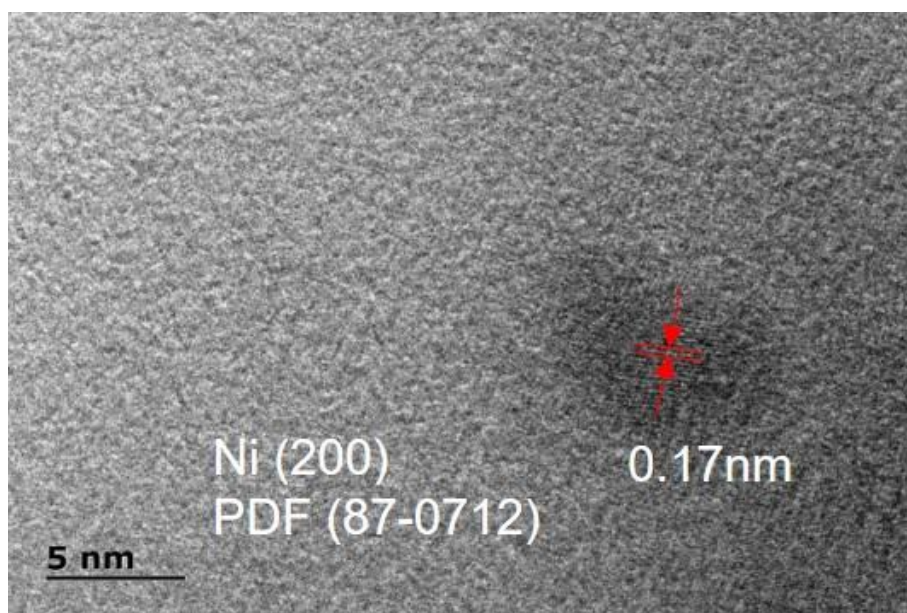

Figure S2 The Ni HRTEM images of the 10%K-NiMoS<sub>2</sub>/MgO catalysts

Table S1. BET data of each catalyst

| Catalyst                      | BET Surface Area (m <sup>2</sup> /g) |
|-------------------------------|--------------------------------------|
| MoS <sub>2</sub>              | 160.08                               |
| Ni-MoS <sub>2</sub>           | 83.79                                |
| Ni-MoS <sub>2</sub> /MgO      | 6.22                                 |
| 6% K-Ni-MoS <sub>2</sub> /MgO | 4.12                                 |

Table S2. Catalytic performance data of MoS<sub>2</sub> catalyst

| Temp.  | CO <sub>2</sub><br>Conversion<br>% | STY <sub>ROH</sub><br>(g/kg/h) | Product Selectivity<br>(%) |      |      | Alcohols<br>Distributions<br>(%) |                    | Hydrocarbon<br>Distributions<br>(%) |                               |
|--------|------------------------------------|--------------------------------|----------------------------|------|------|----------------------------------|--------------------|-------------------------------------|-------------------------------|
|        |                                    |                                | ROH                        | RH   | CO   | C <sub>1</sub> OH                | C <sub>2+</sub> OH | CH <sub>4</sub>                     | C <sub>2</sub> H <sub>6</sub> |
|        |                                    |                                |                            |      |      |                                  |                    |                                     |                               |
| 320 °C | 45.14                              | 0.008                          | 1.1                        | 86.0 | 12.9 | 96.2                             | 3.8                | 96.8                                | 3.2                           |
